# Supplementary material
Source: MDPI journal article supplement (https://www.mdpi.com/2073-4441/15/10/1949)
Supplement: s1 [file s1]

## Supporting Information

### In situ Polyaniline Immobilized ZnO Nanorods for the Efficient Adsorptive Detoxification of Cr (VI) from Aquatic System

Fahad A Alharthi \*, Riyadh H. Alshammari and Imran Hasan \*

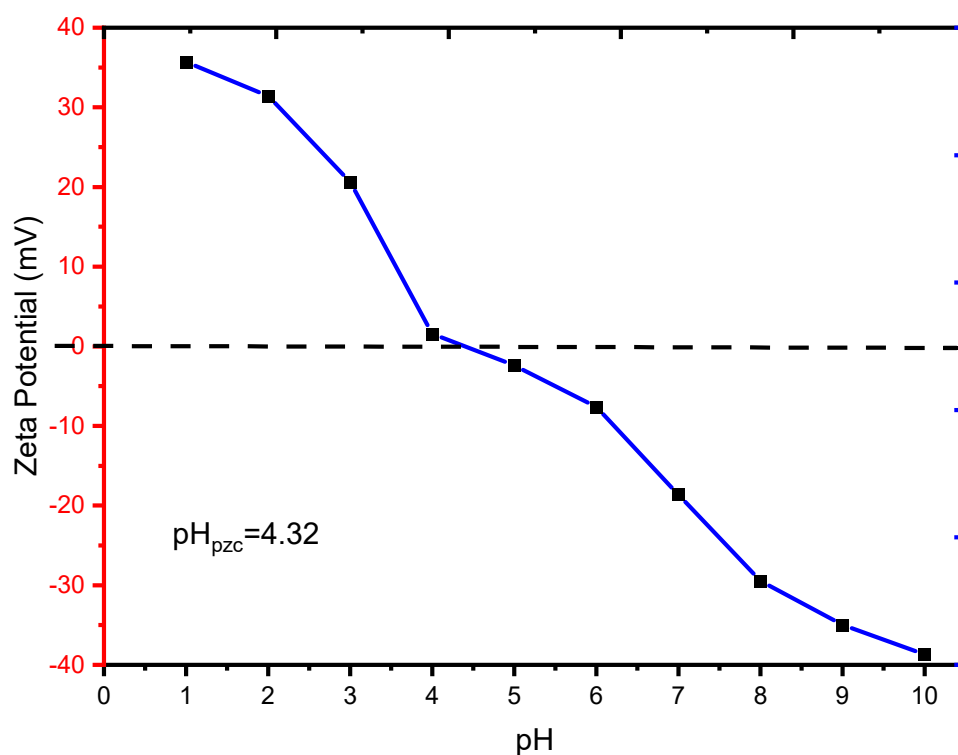

Figure S1. Point of zero charge (pHpzc) analysis using Zeta potential

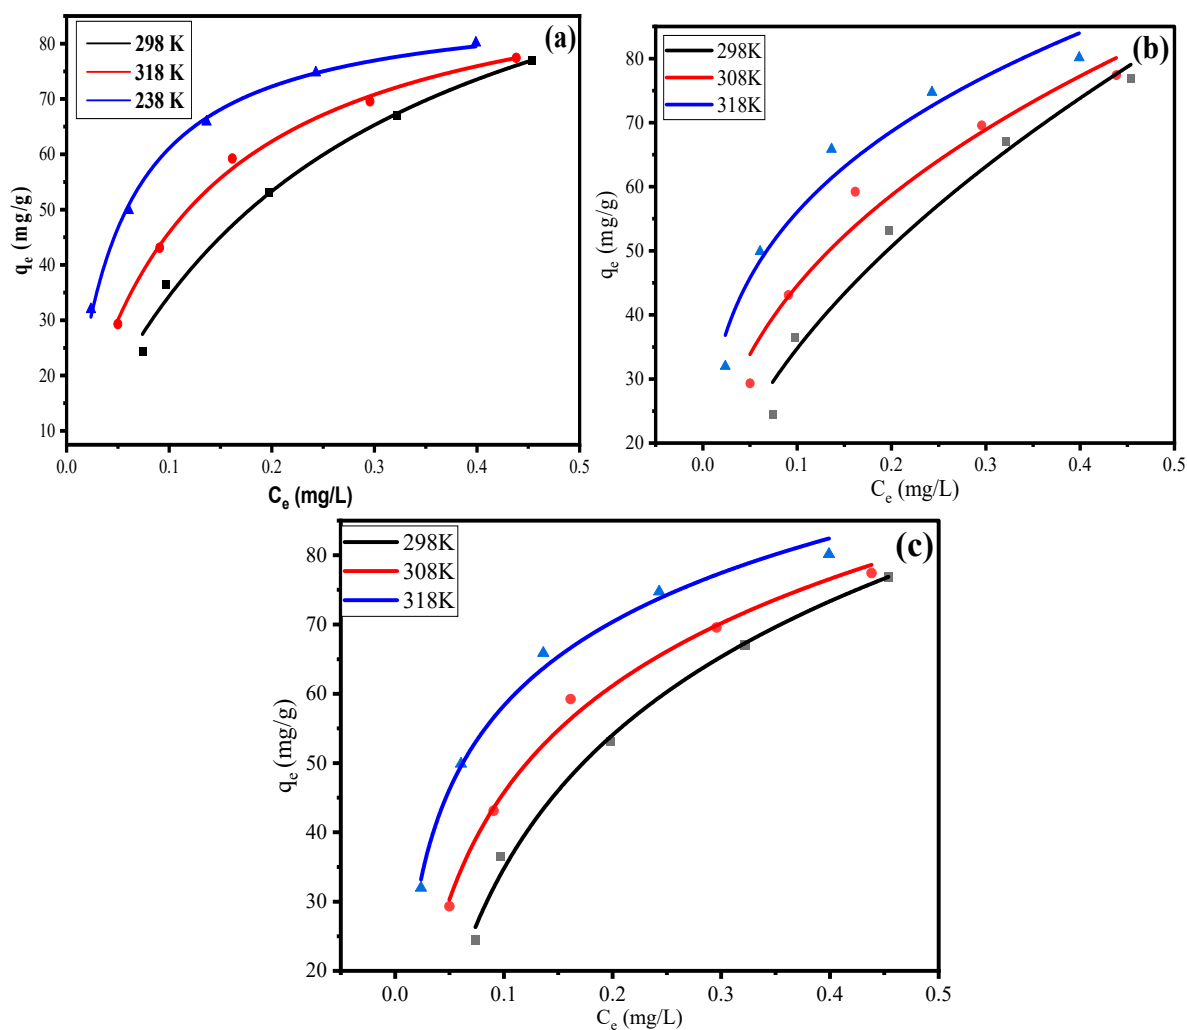

**Figure S2.** Non-linear regression for (a) Langmuir (b) Freundlich and (c) Temkin isotherms at 298 to 318 K temperature

**Table S1.** Adsorption isotherm parameters for the removal of (100 mg/L) Cr (VI) on ZnO@PAni NRs at 298K, 308K and 318K obtained by non-linear regression analysis

| Model      | Parameters                  | 298 K  | 308K   | 318K   |
|------------|-----------------------------|--------|--------|--------|
| Langmuir   | $q_m$ (mg/g)                | 142.27 | 219.18 | 310.47 |
|            | $K_L$ (L/mg)                | 0.412  | 0.767  | 0.849  |
|            | $R^2$                       | 0.99   | 0.99   | 0.99   |
| Freundlich | $K_F$ (mg/g) <sup>1/n</sup> | 109.79 | 111.17 | 121.44 |
|            | $n$                         | 1.84   | 2.52   | 3.42   |
|            | $R^2$                       | 0.98   | 0.97   | 0.96   |
| Temkin     | $A$ (L/mg)                  | 39.82  | 77.99  | 135.81 |
|            | $b$ (J/mol)                 | 88.96  | 115.04 | 152.47 |
|            | $R^2$                       | 0.99   | 0.98   | 0.98   |
